# Supplementary material
Source: PubMed Central journal article supplement (PMC4417626)
Supplement: NIHMS605065-supplement-1.pdf [file NIHMS605065-supplement-1.pdf]

## Supplementary Information

### How Proteins Bind Macrocycles

Elizabeth A. Villar, Dmitri Beglov, Spandan Chennamadhavuni, John A. Porco Jr., Dima

Kozakov\*, Sandor Vajda\* and Adrian Whitty\*

#### **SUPPLEMENTARY RESULTS**

- Supplementary Figure 1** Identity of the protein-MC complexes that make up the test set, and chemical structures of the MCs.
- Supplementary Figure 2** Comparison of ring sizes between MCs in the test set, oral MC drugs, and the 3747 natural product MCs described by Wessjohann.
- Supplementary Figure 3** Close-up of MC binding modes for (A) large and (B) small MCs in the test set.
- Supplementary Figure 4** Polar/nonpolar breakdown for contact atoms v. all atoms for all MCs individually.
- Supplementary Figure 5** Overlap of different MC regions with binding energy hot spots.
- Supplementary Figure 6** Graph of degrees of unsaturation in the ring plotted against ring size for the large MCs and the oral MC drugs.
- Supplementary Table 1** Properties of approved MC drugs.
- Supplementary Table 2** Table of molecular characteristics of MCs in the test set compared to MC drugs and all oral drugs.
- Supplementary Table 3** Extent and polar/nonpolar balance of binding interface.
- Supplementary Table 4** Structural composition of MCs in test set, and analysis of contact atoms by region.
- Supplementary Table 5** Intramolecular hydrogen bonds in the bound conformations of the MCs from the test set.
- Supplementary Table 6** List of complexes that comprise the Comparator Set of protein complexes with druglike ligands.
- Supplementary Table 7** Druggability analysis of MC binding sites.

**Supplementary Figure 1A.** The test set comprises 19 unique MCs and 13 unique proteins. MCs above the dashed line have molecular weights >600 Da., and thus are considered as “large MCs” for the purposes of this study. PDB codes for the complexes in the test set are given in Methods.

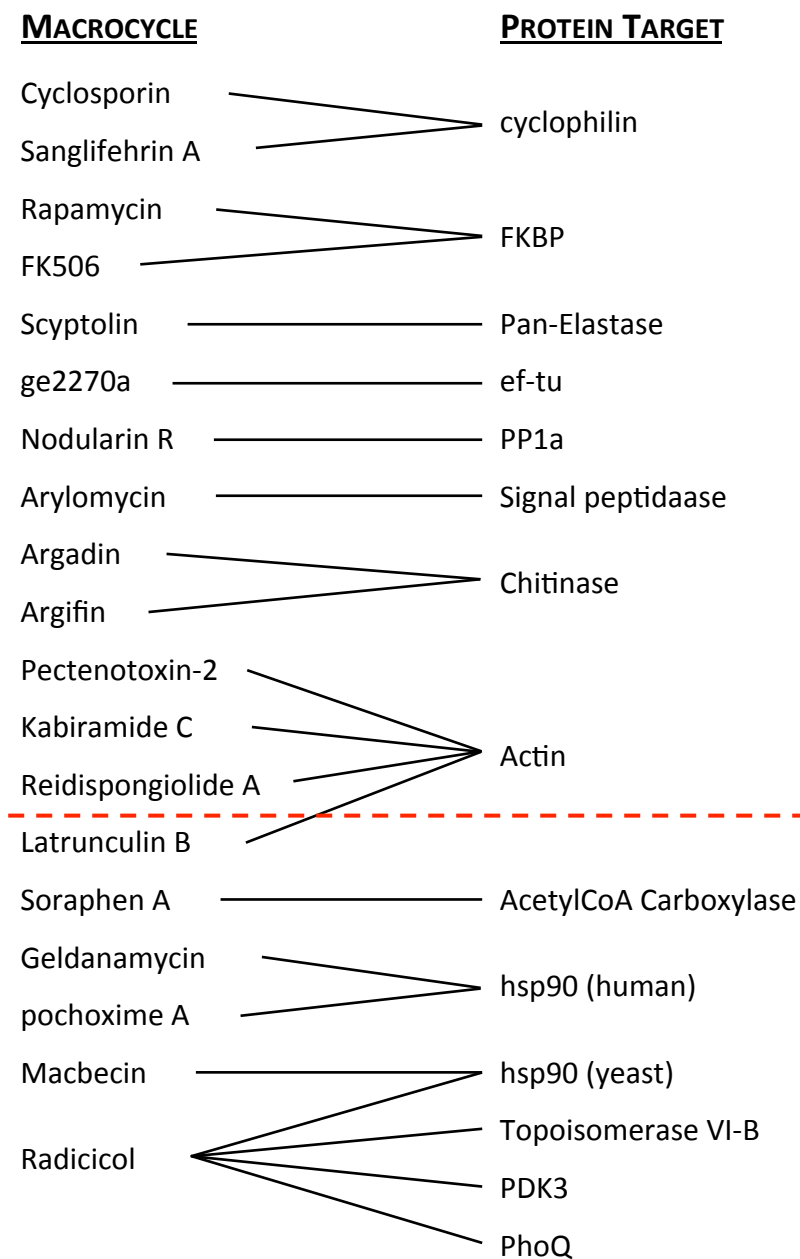



## Supplementary Figure 1B (Continued)

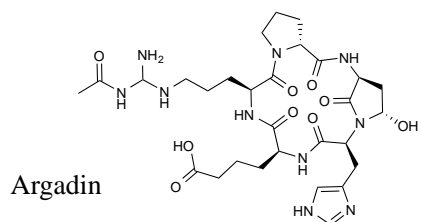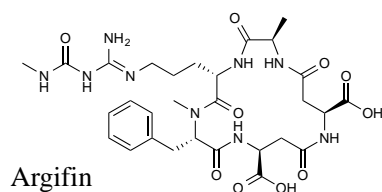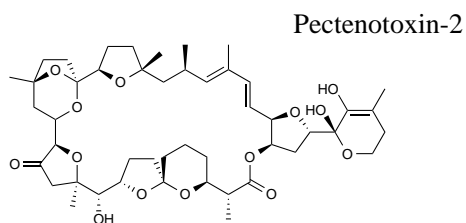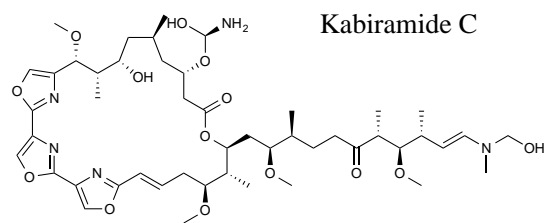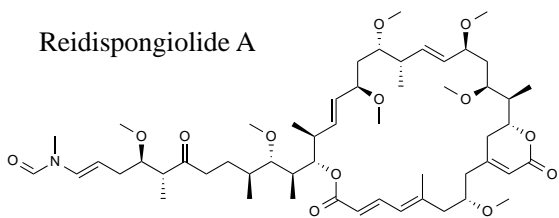

## Small Macrocycles (MW < 600 da)

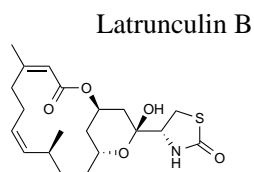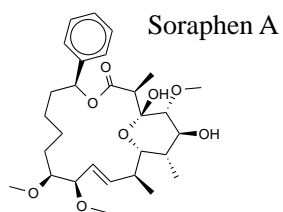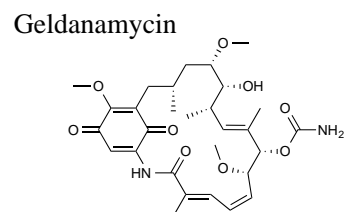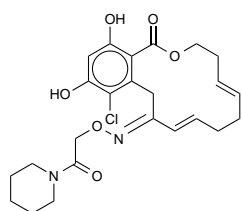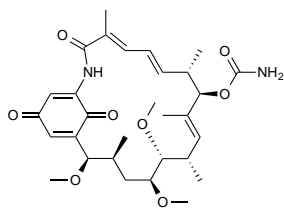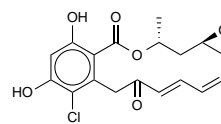

Pochoxime A

Macbecin

Radicicol

**Supplementary Figure 2.** Distribution of ring sizes for the MCs in the test set.

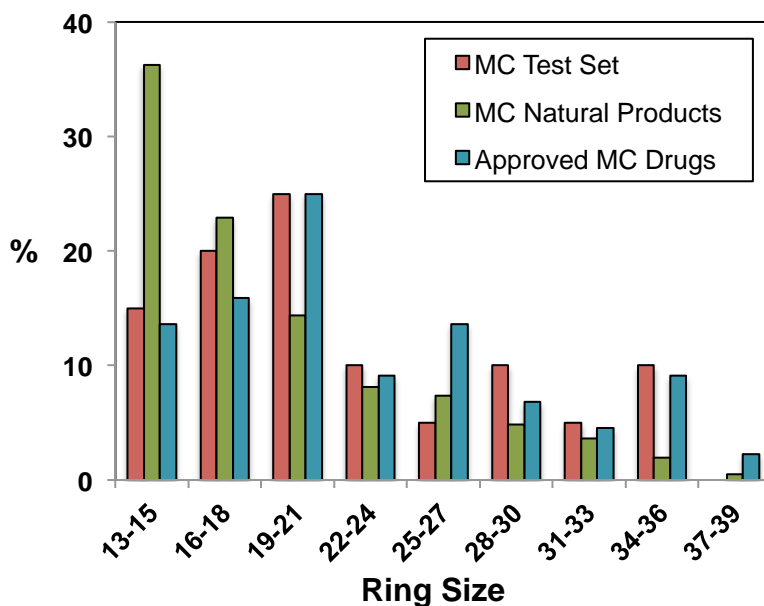

Distribution of ring sizes for the MCs in the test set compared to the 3747 natural product MCs described in reference (15) (main text), and the 44 approved MC drugs from Supplementary Table 1. The figure shows that, in terms of ring size, our test set is fairly representative of all natural product MCs, with two exceptions: (1) The smallest range of ring sizes, containing 13-15 atoms, is relatively under-represented in our study set. In the original publication (reference 15, main text) the authors attributed the abundance of natural product MCs in this ring size range to the great variety of 14-membered macrocyclic terpenoids that exist in nature. The fact that our structurally characterized subset of MCs is not similarly biased towards 14-membered rings is, in our opinion, desirable, given that our goal is to characterize protein-MC binding in general, and not to particularly focus on one size range or structural class. (2) Our test set contains a somewhat disproportionate number of very large-ring MCs, with ring size 34-36 atoms. This feature probably arises from the fact that a handful of large MCs such as cyclosporin A and FK506 have been of high interest as pharmaceuticals, leading to a strong drive to elucidate their X-ray crystal structures in complex with their protein targets. In terms of ring size our test set closely mirrors the size distribution found for approved MC drugs, even though only three compounds are common to both sets.

Supplementary Figure 3. Binding geometries for MCs in the test set. (A) Large MCs

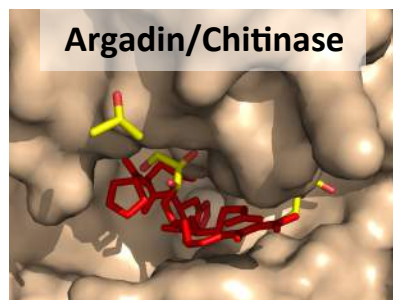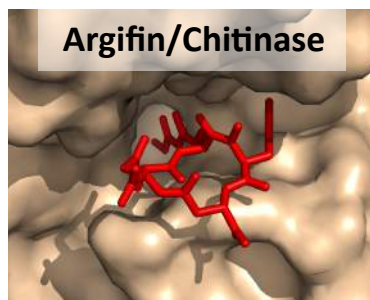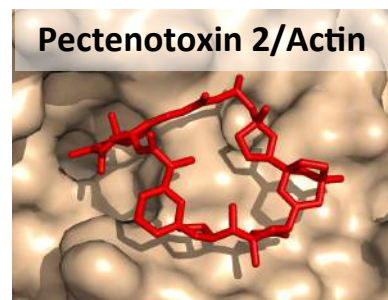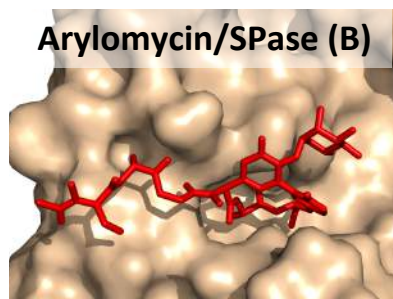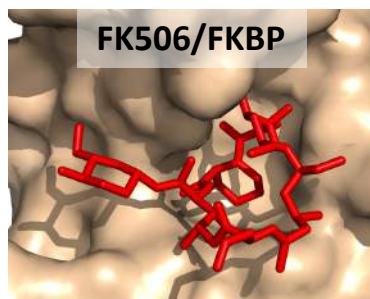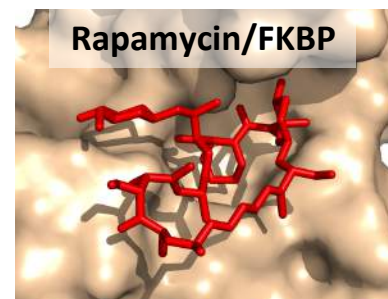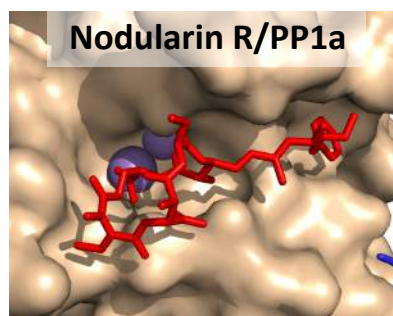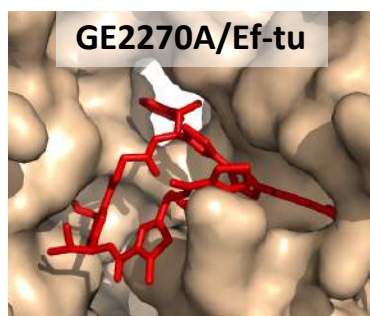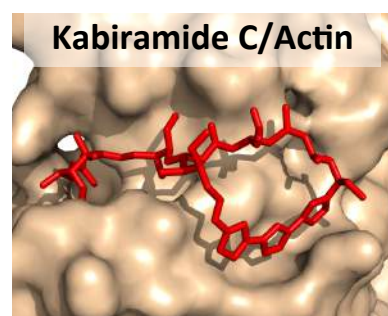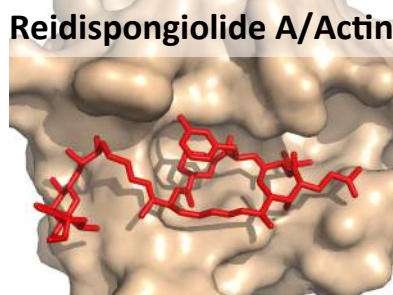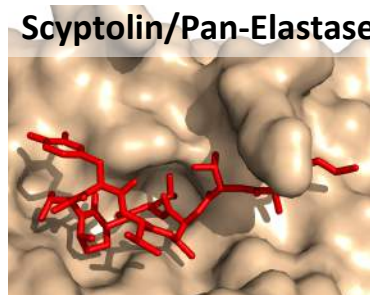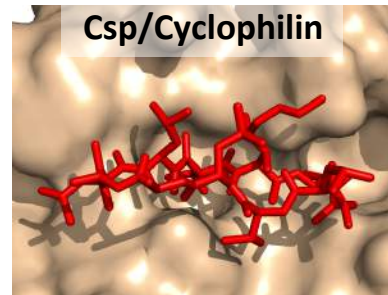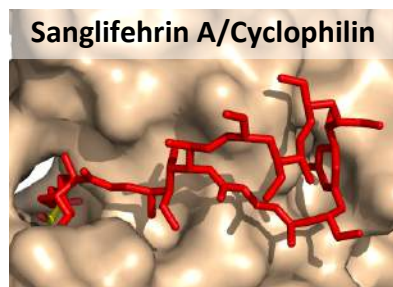

**Supplementary Figure 3, cont'd. Binding geometries for MCs in the test set. (B) Small MCs.**

The black dashed box indicates the four distinct MCs for which there are structures bound to hsp90; the red dashed box indicates the four complexes that contain Radicicol.

Geldanamycin/hsp90(h)

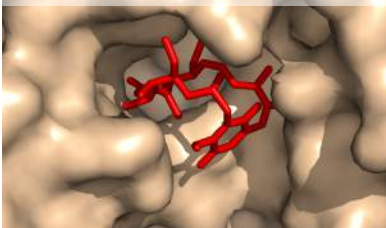

Pochoxime A/hsp90(y)

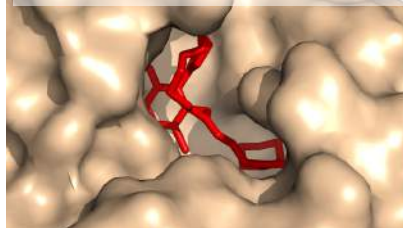

Soraphen A/AcCoA Carbox.

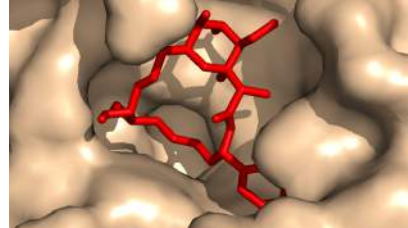

Macbecin/hsp90(y)

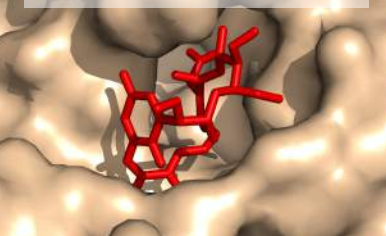

Radicicol/hsp90(y)

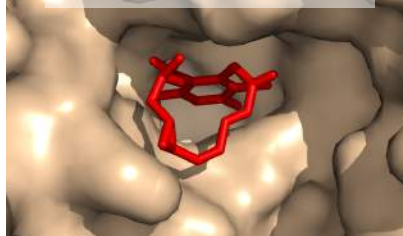

Radicicol/PDK3

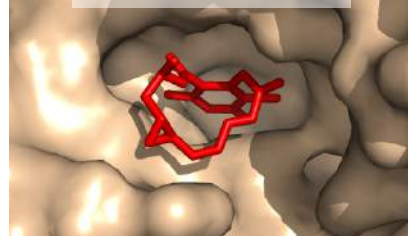

Latrunculin B/Actin

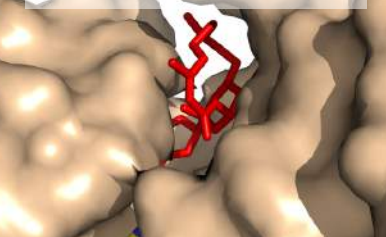

Radicicol/Topoisomerase

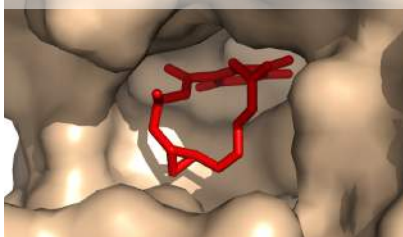

Radicicol/PhoQ

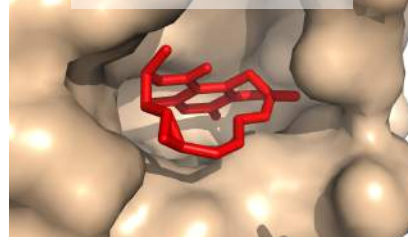

**Supplementary Figure 4.** Polar/non-polar breakdown for contact atoms versus all MC atoms, shown separately for each MC-protein complex.

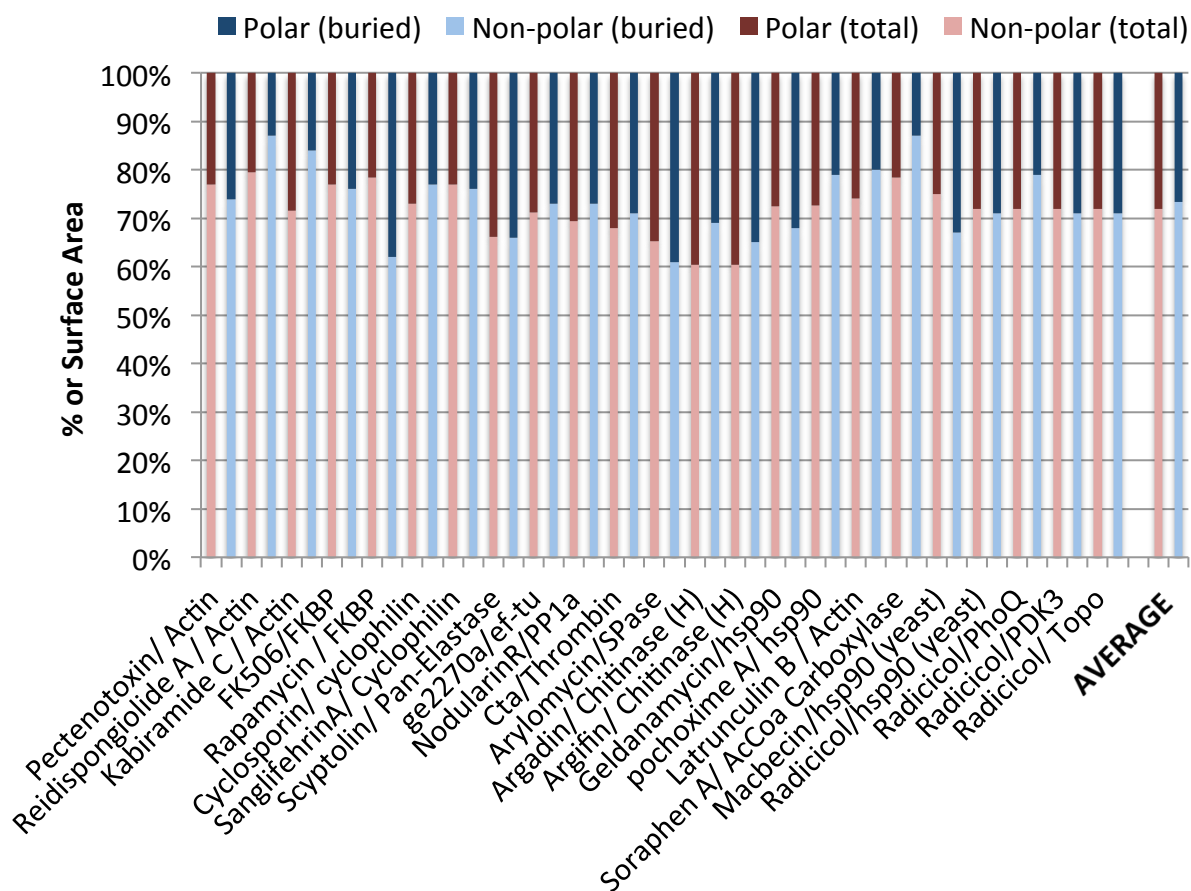



## Supplementary Figure 5. Overlap of different regions of MC structure with FTMap Consensus Clusters (CCs)

### A. Overlap with all CCs

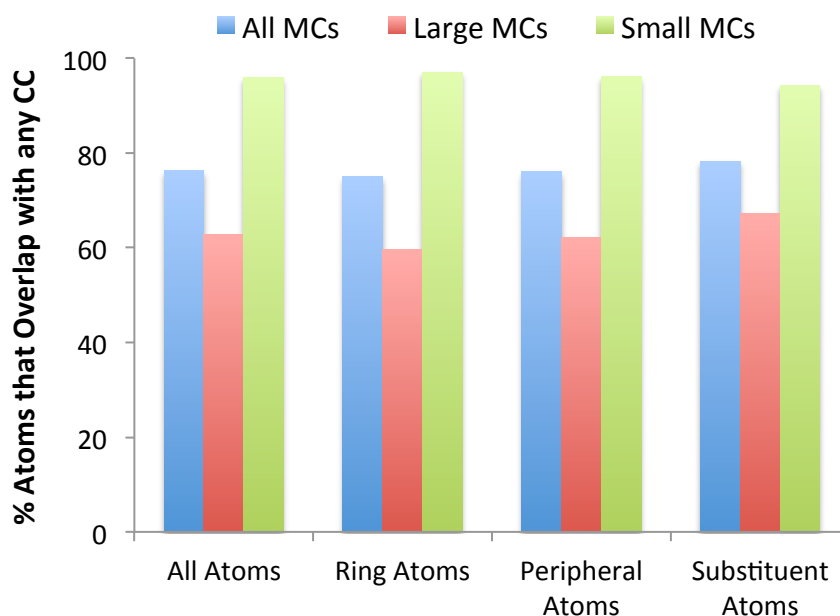

### B. Overlap with with the two top-ranking CCs

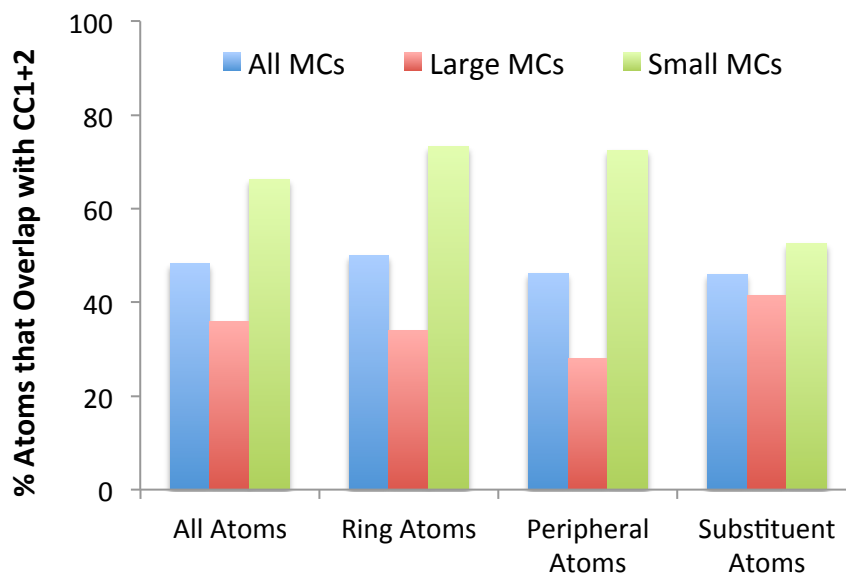

An MC atom was considered to overlap with a hot spot if (i) the center of mass of the probes in a given CC fell within 2 Å of the MC atom, and (ii) at least 25% of the CC probe atoms were within 1.25 Å of the MC atom. Results were robust with respect to the distance constraint used to define hot spot occupancy, and also with respect to whether the analysis was restricted to the two or three highest-ranking hot spots, or whether all CCs were included.

**Supplementary Figure 6.** Plot showing how the number of degrees of unsaturation (DOU) in the MC ring varies with ring size ( $R$ ), for the large MCs in the test set and also for oral MC drugs. Degrees of unsaturation include  $\pi$  bonds or amide C-N bonds in the ring, or fused ring systems that inhibit dihedral vibration about a ring  $\sigma$  bond. The data substantiate the intuitively expected trend that larger rings tend to have more DOU. The solid line represents the relationship  $\text{DOU} = 0.4R - 4$ , and the dashed lines show the boundaries for 3 DOU above and below the solid line, illustrating the best description of the relationship given the limited number of data points that are available.

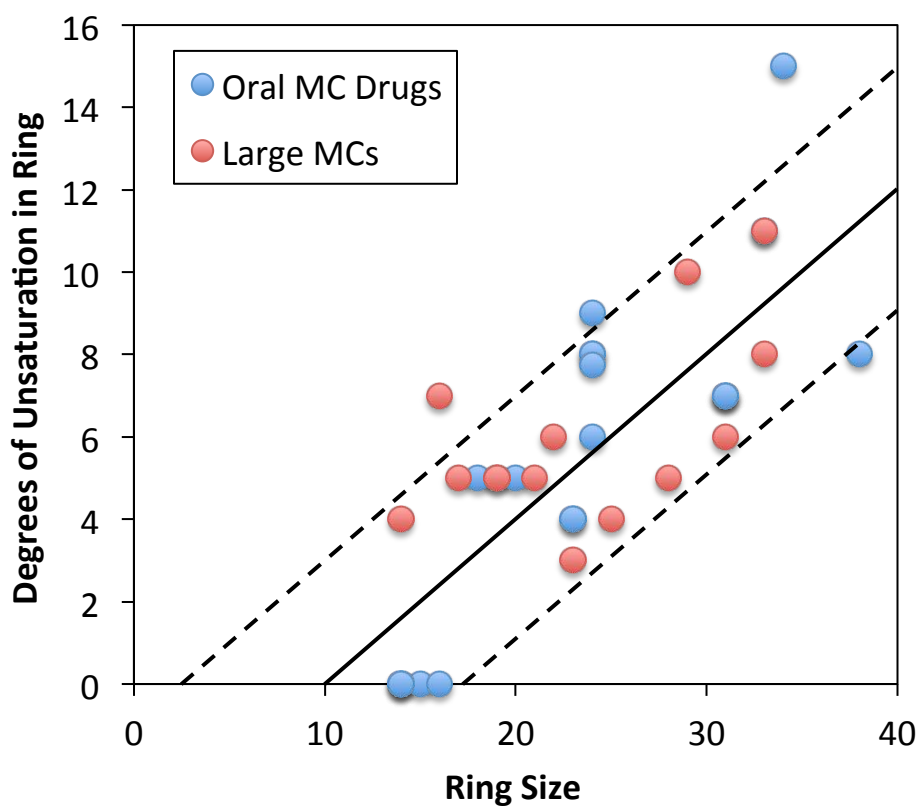

**Supplementary Table 1. Predicted properties of 44 macrocycles that are approved drugs.**

| DRUG                           | MOL. WT      | PROPERTIES (Prediction from CHEMAXON <sup>1</sup> ) |                                    |                  |                  | Rotatable Bonds |
|--------------------------------|--------------|-----------------------------------------------------|------------------------------------|------------------|------------------|-----------------|
|                                |              | cLogP <sup>2</sup>                                  | PSA (Å <sup>2</sup> ) <sup>3</sup> | HBA <sup>4</sup> | HBD <sup>5</sup> |                 |
| <b>Orally Bioavailable</b>     |              |                                                     |                                    |                  |                  |                 |
| Rifaximin                      | 785.4        | 3.3                                                 | 205.3                              | 11               | 5                | 3               |
| Amphotericin B                 | 923.5        | -2.3                                                | 324.1                              | 17               | 12               | 3               |
| Rifabutin                      | 846.4        | 4.2                                                 | 206.8                              | 13               | 5                | 5               |
| Rifampin                       | 822.4        | 2.8                                                 | 224.2                              | 14               | 6                | 5               |
| Sirolimus                      | 913.6        | 7.5                                                 | 195.4                              | 12               | 3                | 6               |
| Rifapentine                    | 876.5        | 3.6                                                 | 221.4                              | 14               | 6                | 6               |
| Tacrolimus                     | 803.5        | 5.6                                                 | 178.4                              | 11               | 3                | 7               |
| Azithromycin                   | 748.5        | 2.4                                                 | 182.5                              | 13               | 5                | 7               |
| Abamectin                      | 874.5        | 5.8                                                 | 170.1                              | 13               | 3                | 8               |
| Clarithromycin                 | 747.5        | 3.2                                                 | 184.1                              | 13               | 4                | 8               |
| Everolimus                     | 957.6        | 7.4                                                 | 204.7                              | 13               | 3                | 9               |
| Troleandomycin                 | 813.5        | 4.3                                                 | 185.4                              | 12               | 0                | 12              |
| roxithromycin                  | 836.5        | 3.0                                                 | 218.1                              | 16               | 5                | 13              |
| vancomycin                     | 1447.4       | -4.4                                                | 539.5                              | 24               | 19               | 13              |
| Erythromycin                   | 861.5        | 3.4                                                 | 227.5                              | 14               | 4                | 14              |
| Cyclosporin A                  | 1201.8       | 3.6                                                 | 278.8                              | 12               | 5                | 15              |
| Fidaxomicin                    | 1056.4       | 8.6                                                 | 269.5                              | 15               | 7                | 15              |
| Desmopressin                   | 1068.4       | -6.1                                                | 437.2                              | 15               | 14               | 19              |
| <b>AVERAGE</b>                 | <b>921.4</b> | <b>3.1</b>                                          | <b>247.4</b>                       | <b>14.0</b>      | <b>6.1</b>       | <b>9.3</b>      |
| <b>Not Orally Bioavailable</b> |              |                                                     |                                    |                  |                  |                 |
| Romidepsin                     | 540.2        | 1.1                                                 | 142.7                              | 5                | 4                | 2               |
| Ixabepilone                    | 506.3        | 3.4                                                 | 112.1                              | 6                | 3                | 2               |
| Natamycin                      | 665.3        | -1.7                                                | 235.4                              | 13               | 7                | 3               |
| Nystatin                       | 925.5        | -1.9                                                | 324.1                              | 17               | 12               | 3               |
| Metocurine                     | 652.4        | -1.8                                                | 55.4                               | 4                | 0                | 4               |
| Eribulin                       | 729.4        | 2.3                                                 | 148.0                              | 12               | 2                | 4               |
| Pimecrolimus                   | 809.4        | 6.8                                                 | 158.1                              | 10               | 2                | 6               |
| Dalfopristin                   | 690.3        | 1.6                                                 | 177.6                              | 9                | 2                | 7               |
| Actinomycin D                  | 1254.6       | -0.1                                                | 355.5                              | 16               | 5                | 8               |
| Quinupristin                   | 1021.5       | 2.2                                                 | 232.4                              | 12               | 4                | 10              |
| Eptifibatide                   | 831.3        | -5.1                                                | 328.5                              | 12               | 11               | 10              |
| Capreomycin                    | 668.3        | -11.0                                               | 382.5                              | 14               | 15               | 10              |
| Viomycin                       | 685.3        | -11.0                                               | 395.3                              | 15               | 16               | 10              |
| Candicidin                     | 1108.6       | 0.2                                                 | 368.7                              | 19               | 11               | 10              |
| Temsirolimus                   | 1029.6       | 7.1                                                 | 242.0                              | 14               | 4                | 11              |
| Anidulafungin                  | 1139.5       | -1.5                                                | 377.4                              | 17               | 14               | 14              |
| Octreotide                     | 1018.4       | -1.4                                                | 335.5                              | 12               | 13               | 17              |
| Lanreotide                     | 1095.5       | -0.3                                                | 358.3                              | 12               | 13               | 17              |
| Oxytocin                       | 1006.4       | -5.0                                                | 401.2                              | 13               | 12               | 17              |
| Micafungin                     | 1269.4       | -6.3                                                | 513.0                              | 22               | 16               | 18              |
| Lypressin                      | 1055.4       | -6.8                                                | 428.8                              | 14               | 13               | 19              |
| Caspofungin                    | 1092.6       | -4.8                                                | 415.3                              | 18               | 16               | 23              |
| Polymyxin B                    | 1202.7       | -7.2                                                | 498.8                              | 18               | 18               | 29              |
| Telavancin                     | 1753.6       | -6.2                                                | 617.5                              | 29               | 23               | 30              |
| Bacitracin                     | 1421.7       | -7.2                                                | 541.0                              | 20               | 17               | 31              |
| Daptomycin                     | 1619.7       | -9.4                                                | 715.0                              | 27               | 22               | 35              |
| <b>AVERAGE</b>                 | <b>992.1</b> | <b>-2.5</b>                                         | <b>340.8</b>                       | <b>14.6</b>      | <b>10.6</b>      | <b>13.5</b>     |

<sup>1</sup>Calculator plug-ins (Marvin 6.0, 2013) were used for structure property prediction, as described in Methods. <sup>2</sup>Log<sub>10</sub> of the calculated 1-octanol/water partition coefficient. <sup>3</sup>Polar surface area, for the predominant ionization state at pH = 7.0. <sup>4</sup>Number of hydrogen bond acceptors. <sup>5</sup>Number of hydrogen bond donors.

**Supplementary Table 2. Structural and physicochemical properties of the MC Test Set compared to macrocyclic drugs and all oral drugs.<sup>a</sup>**

| Class                                                       | Mol. Wt.                                   | cLogP                                       | PSA (Å <sup>2</sup> )                     | HBD                                     | HBA                                      | Rotatable Bonds                         |
|-------------------------------------------------------------|--------------------------------------------|---------------------------------------------|-------------------------------------------|-----------------------------------------|------------------------------------------|-----------------------------------------|
| <b>MC Test Set</b><br>( <i>n</i> = 19)                      | <b>778 ± 265</b><br>(476-1090)<br>P<0.0001 | <b>2.8 ± 3.9</b><br>(-2.5-5.7)<br>P=0.37    | <b>212 ± 84</b><br>(104-296)<br>P<0.0001  | <b>4.9 ± 3.2</b><br>(2-9)<br>P<0.0001   | <b>10.7 ± 3.4</b><br>(6-13)<br>P<0.0001  | <b>8.6 ± 5.7</b><br>(1-15)<br>P<0.0001  |
| <b>Large</b><br>( <i>n</i> = 13)                            | <b>915 ± 194</b><br>(676-1202)<br>P<0.0001 | <b>2.3 ± 4.7</b><br>(-5.1-7.5)<br>P=1.0     | <b>255 ± 60</b><br>(178-322)<br>P<0.0001  | <b>6.1 ± 3.2</b><br>(3-10)<br>P<0.0001  | <b>12.7 ± 1.7</b><br>(11-15)<br>P<0.0001 | <b>11.2 ± 5.0</b><br>(6-18)<br>P<0.0001 |
| <b>Small</b><br>( <i>n</i> = 6)                             | <b>479 ± 84</b><br>(396-559)<br>P=0.0021   | <b>3.9 ± 0.6</b><br>(3.5-4.5)<br>P=0.103    | <b>118 ± 33</b><br>(96-143)<br>P=0.0278   | <b>2.3 ± 0.8</b><br>(2-2)<br>P=0.3083   | <b>6.5 ± 2.1</b><br>(5-7)<br>P=0.3653    | <b>3.0 ± 2.1</b><br>(1-5)<br>P=0.0937   |
| <b>MC Drugs<sup>b</sup></b><br>( <i>n</i> = 44)             | <b>963 ± 268</b><br>(668-1269)<br>P<0.0001 | <b>-0.2 ± 5.3</b><br>(-7.2-6.8)<br>P<0.0001 | <b>303 ± 14</b><br>(158-513)<br>P<0.0001  | <b>8.7 ± 6.2</b><br>(2-17)<br>P<0.0001  | <b>14.4 ± 4.9</b><br>(10-20)<br>P<0.0001 | <b>11.8 ± 8.2</b><br>(3-23)<br>P<0.0001 |
| <b>Orally Available<sup>c</sup></b><br>( <i>n</i> = 18)     | <b>921 ± 177</b><br>(785-1068)<br>P<0.0001 | <b>3.1 ± 3.9</b><br>(-2.3-7.4)<br>P= 0.166  | <b>247 ± 98</b><br>(183-324)<br>P<0.0001  | <b>6.1 ± 4.6</b><br>(3-12)<br>P<0.0001  | <b>14.0 ± 3.0</b><br>(12-16)<br>P<0.0001 | <b>9.3 ± 4.7</b><br>(5-15)<br>P<0.0001  |
| <b>Not Orally Available<sup>d</sup></b><br>( <i>n</i> = 26) | <b>992 ± 316</b><br>(665-1269)<br>P<0.0001 | <b>-2.5 ± 4.9</b><br>(-7.2-2.3)<br>P<0.0001 | <b>341 ± 160</b><br>(148-513)<br>P<0.0001 | <b>10.6 ± 6.6</b><br>(2-17)<br>P<0.0001 | <b>14.6 ± 5.9</b><br>(9-20)<br>P<0.0001  | <b>13.5 ± 9.6</b><br>(3-29)<br>P<0.0001 |
| <b>All Oral Drugs<sup>e</sup></b><br>( <i>n</i> = 1193)     | <b>344 ± 107</b><br>(200-475)              | <b>2.3 ± 2.4</b><br>(-0.8-5.2)              | <b>78 ± 44</b><br>(22-134)                | <b>1.8 ± 1.2</b><br>(0-3)               | <b>5.5 ± 2.7</b><br>(2-9)                | <b>5.4 ± 3.5</b><br>(1-10)              |

<sup>a</sup>Numbers are mean ± standard deviation values, with the 10-90% range given in parentheses.

Abbreviations are: clogP, log<sub>10</sub> of calculated 1-octanol/water partition coefficient; PSA, polar surface area for the predominant ionization state at pH = 7.0; HBD, number of hydrogen bond donors; HBA, number of hydrogen bond acceptors. Properties calculated using ChemAxon Software Calculator plug-ins (Marvin 6.0, 2013), as described in Methods. P values represent the probability that the average property value for the MC set in question differs from the average value for all oral drugs, and were calculated using classical (non-paired) t-tests after establishing sample normality using the Anderson-Darling test (see Methods for details). <sup>b</sup>MC Drugs include all compounds in the ChEMBL Database that were listed as approved drugs and that have a macrocyclic structure, plus a

small number of additional compounds identified from web-based sources. <sup>c</sup>The subset of MC Drugs that can be administered orally with the exception of Nystatin which, though administered orally to treat GI tract fungal infections, is not systemically absorbed (1). <sup>d</sup>The subset of MC Drugs that cannot be administered orally, including Nystatin (see note e). <sup>e</sup>Values from Vieth et al. (2).

**Supplementary Table 3. Extent and physicochemical character of the MC surface area that is buried in the complex.<sup>a</sup>**

|                                                            | <b>MC Test Set<sup>b</sup></b><br>( <i>n</i> = 22) | <b>Large MCs<sup>c</sup></b><br>( <i>n</i> = 13) | <b>Small MCs<sup>d</sup></b><br>( <i>n</i> = 9) |
|------------------------------------------------------------|----------------------------------------------------|--------------------------------------------------|-------------------------------------------------|
| <b>ΔASA (Complex)<sup>e</sup></b>                          | 984 ± 235 Å <sup>2</sup>                           | 1106 ± 199 Å <sup>2</sup>                        | 807 ± 163 Å <sup>2</sup>                        |
| <b>ΔASA (MC only)<sup>f</sup></b>                          | 571 ± 127 Å <sup>2</sup>                           | 628 ± 116 Å <sup>2</sup>                         | 489 ± 97 Å <sup>2</sup>                         |
| <b>% of MC SASA buried<sup>g</sup></b>                     | 67 ± 14 %                                          | 57 ± 8 %                                         | 82 ± 4 %                                        |
| <b>Buried MC PSA<sup>h</sup></b>                           | 139 ± 42 Å <sup>2</sup>                            | 142 ± 43 Å <sup>2</sup>                          | 134 ± 43 Å <sup>2</sup>                         |
| <b>Buried MC NPSA<sup>i</sup></b>                          | 432 ± 137 Å <sup>2</sup>                           | 486 ± 134 Å <sup>2</sup>                         | 355 ± 104 Å <sup>2</sup>                        |
| <b>% Buried MC SASA that is Polar/Nonpolar<sup>j</sup></b> | 25/75 ± 9 %                                        | 23/77 ± 9 %                                      | 28/71 ± 9 %                                     |
| <b>Number of Hydrogen Bonds</b>                            | 3.8 ± 2                                            | 4.8 ± 4.8                                        | 2.3 ± 1                                         |

<sup>a</sup>SASA and ΔASA values calculated as described in Methods. Numbers given are mean values plus or minus the standard deviation. <sup>b</sup>Test Set of 22 MC-protein complexes, involving 19 distinct MCs and 13 distinct proteins (See Supplementary Figure 1). <sup>c</sup>Complexes containing MCs with MW > 700 Da., involving 13 distinct MCs bound to 8 distinct proteins (See Supplementary Figure 1). <sup>d</sup>Complexes containing MCs with MW < 600 Da., involving 6 distinct MCs and 5 distinct proteins (See Supplementary Figure 1). <sup>e</sup>Total buried solvent accessible surface area for protein plus MC ligand. <sup>f</sup>Amount of MC surface area buried in the complex. <sup>g</sup>Percentage of MC SASA buried in the complex. <sup>h</sup>Amount of MC polar SASA buried in the complex. <sup>i</sup>Amount of MC nonpolar SASA buried in the complex. <sup>j</sup>Percentage of MC ΔASA that is polar/nonpolar, expressed as a percentage of total MC ΔASA.

**Supplementary Table 4.** Contributions to MC contact area, and physicochemical nature of the contacts, made by ring atoms, “peripheral” atoms and substituent atoms (as defined in the main text).<sup>a</sup>

|                                                                     | <b>Test Set<sup>b</sup></b><br>( <i>n</i> = 22) | <b>Large MCs<sup>c</sup></b><br>( <i>n</i> = 13) | <b>Small MCs<sup>d</sup></b><br>( <i>n</i> = 9) |
|---------------------------------------------------------------------|-------------------------------------------------|--------------------------------------------------|-------------------------------------------------|
| <b>Structural Composition of MCs</b>                                |                                                 |                                                  |                                                 |
| <b>Number of Ring atoms</b>                                         | 22 ± 7                                          | 25 ± 7                                           | 17 ± 2                                          |
| % of total HA                                                       | 42 ± 10 %                                       | 38 ± 8 %                                         | 50 ± 6 %                                        |
| <b>Number of Peripheral atoms</b>                                   | 8.4 ± 4.5                                       | 9.9 ± 4.5                                        | 5.2 ± 2.4                                       |
| % of total HA                                                       | 15 ± 6 %                                        | 15 ± 6 %                                         | 15 ± 6 %                                        |
| <b>Number of Substituent Atoms</b>                                  | 24 ± 12                                         | 30 ± 10                                          | 12 ± 5                                          |
| % of total HA                                                       | 43 ± 14 %                                       | 47 ± 13 %                                        | 35 ± 11 %                                       |
| <b>Average Number of Substituents</b>                               | 4.1 ± 1.9                                       | 4.7 ± 1.7                                        | 2.8 ± 1.7                                       |
| <b>Ring atoms per Peripheral group</b>                              | 3.4 ± 2.6                                       | 2.8 ± 0.8                                        | 4.8 ± 4.5                                       |
| <b>Physicochemical Composition of MCs</b>                           |                                                 |                                                  |                                                 |
| Total MC                                                            | 28/72 ± 6 %                                     | 29/71 ± 7 %                                      | 26/74 ± 2 %                                     |
| Ring                                                                | 15/85 ± 11 %                                    | 19/81 ± 11 %                                     | 7/93 ± 3 %                                      |
| Peripheral                                                          | 60/40 ± 19 %                                    | 62/38 ± 16 %                                     | 57/43 ± 26 %                                    |
| Substituent                                                         | 30/70 ± 11 %                                    | 26/74 ± 10 %                                     | 37/63 ± 11 %                                    |
| <b>MC Regional Contributions to Contact with Protein</b>            |                                                 |                                                  |                                                 |
| % ΔASA due to Ring Atoms                                            | 21 ± 11 %                                       | 15 ± 7 %<br>P<0.0001 <sup>k</sup>                | 29 ± 9 %<br>P=0.00016 <sup>k</sup>              |
| % ΔASA due to Peripheral Groups                                     | 24 ± 13 %                                       | 22 ± 14 %<br>P<0.0001 <sup>k</sup>               | 26 ± 10 %<br>P<0.0001 <sup>k</sup>              |
| % ΔASA due to Substituents                                          | 55 ± 17 %                                       | 62 ± 16 %                                        | 46 ± 8 %                                        |
| <b>Percentage of Atoms in each MC Region that are buried</b>        |                                                 |                                                  |                                                 |
| Ring Atoms                                                          | 35 ± 19 %                                       | 24 ± 15 %                                        | 51 ± 11 %                                       |
| Peripheral Atoms                                                    | 81 ± 18 %                                       | 72 ± 17 %<br>P<0.0001 <sup>l</sup>               | 94 ± 12 %<br>P<0.0001 <sup>l</sup>              |
| Substituent Atoms                                                   | 66 ± 21 %                                       | 54 ± 17 %<br>P<0.0001 <sup>l</sup>               | 83 ± 13 %<br>P=0.00016 <sup>l</sup>             |
| <b>Percentage of buried atoms by Region that are Polar/Nonpolar</b> |                                                 |                                                  |                                                 |
| Ring Atoms                                                          | 7/93 ± 13 %                                     | 10/90 ± 16 %                                     | 3/97 ± 7%                                       |
| Peripheral Atoms                                                    | 60/40 ± 22 %                                    | 59/41 ± 21 %                                     | 60/40 ± 24 %                                    |
| Substituent Atoms                                                   | 26/74 ± 14 %                                    | 21/79 ± 16 %                                     | 32/68 ± 10%                                     |

<sup>a</sup>Numbers given are mean values plus or minus the standard deviation. <sup>b</sup>Test Set of 22

MC-protein complexes, involving 19 distinct MCs and 13 distinct proteins (See Supplementary Figure 1A). <sup>c</sup>Complexes containing MCs with MW > 600 Da., involving 13 distinct MCs bound to 8 distinct proteins (See Figure 1A). <sup>d</sup>Complexes containing MCs with MW < 600 Da., involving 6 distinct MCs and 5 distinct proteins (See Supplementary Figure 1A). <sup>e</sup>Total buried solvent accessible surface area for protein plus MC ligand. <sup>f</sup>Amount of MC surface area buried in the complex. <sup>g</sup>Percentage of MC SASA buried in the complex. <sup>h</sup>Amount of MC polar SASA buried in the complex. <sup>i</sup>Amount of MC nonpolar SASA buried in the complex. <sup>j</sup>Percentage of MC  $\Delta$ SASA that is polar/nonpolar, expressed as a percentage of total MC  $\Delta$ SASA. <sup>k</sup>Probability that the mean value differs from that observed for the substituent atoms, calculated using the Mann-Whitney U (rank) test. <sup>l</sup>Probability that the mean value differs from that observed for ring atoms, calculated using the Mann-Whitney U (rank) test.



**Supplementary Table 5. Analysis of intramolecular hydrogen bonds in the bound MCs from the test set.**

| Protein               | MC Ligand                     | PDB <sup>a</sup> | MC (total) <sup>b</sup> |     | Intramolecular Hydrogen Bonds in Bound MC |                                                                                                                  |
|-----------------------|-------------------------------|------------------|-------------------------|-----|-------------------------------------------|------------------------------------------------------------------------------------------------------------------|
|                       |                               |                  | HBD                     | HBA | Number                                    | Description                                                                                                      |
| Cyclophilin           | Cyclosporin A                 | 1cwa             | 5                       | 12  | <b>1</b>                                  | OH to O (single OH) substituent to periphery                                                                     |
|                       | Sanglifehrin A                | 1sfa             | 9                       | 14  | <b>2</b>                                  | 1: NH (ring) to O of OH (peripheral), 2: NH to O of OH (both within a substituent)                               |
| FKBP                  | FK50                          | 2fke             | 3                       | 12  | <b>none</b>                               |                                                                                                                  |
|                       | Rapamycin                     | 2dg3             | 3                       | 13  | <b>none</b>                               |                                                                                                                  |
| Pan. elastase         | Scyptolin                     | 1okx             | 10                      | 14  | <b>2</b>                                  | 1: NH (ring) to O (peripheral); 2: NH (ring) to O of OH (peripheral)                                             |
| EF-TU                 | GE2270A                       | 1d8t             | 8                       | 17  | <b>2</b>                                  | 1: NH (substituent) to O (peripheral); 2: NH (ring) to O (substituent)                                           |
| PP1a                  | Nodularin R                   | 3e7a             | 10                      | 11  | <b>2</b>                                  | 1: NH (ring) to O (substituent); 2: NH (ring) to O (peripheral)                                                  |
| Spase                 | Arylomycin                    | 1t7d             | 8                       | 11  | <b>none</b>                               |                                                                                                                  |
| Chitinase             | Argadin                       | 1waw             | 10                      | 11  | <b>5</b>                                  | 2 within ring (ring NH to peripheral O), 1 from ring NH to substituent O, 2 between 2 pairs of substituent atoms |
|                       | Argifin                       | 1wb0             | 10                      | 12  | <b>2</b>                                  | 1: ring NH to peripheral O, 1 within large substituent                                                           |
| Actin                 | Kabiramide C                  | 1qz5             | 4                       | 16  | <b>none</b>                               |                                                                                                                  |
|                       | Reidispongiolide A            | 2asm             | 0                       | 13  | <b>none</b>                               |                                                                                                                  |
|                       | Latrunculin B                 | 2q0u             | 2                       | 6   | <b>none</b>                               |                                                                                                                  |
|                       | Pectenotoxin 2                | 2q0r             | 3                       | 14  | <b>none</b>                               |                                                                                                                  |
| AcetylCoA Carboxylase | Soraphen A                    | 3gid             | 2                       | 8   | <b>1</b>                                  | Peripheral OH to O of substituent OH                                                                             |
| HSP90 (human)         | Geldanamycin                  | 1yet             | 4                       | 9   | <b>none</b>                               |                                                                                                                  |
|                       | Pochoxime A                   | 3inw             | 2                       | 8   | <b>none</b>                               |                                                                                                                  |
| HSP90 (yeast)         | Macbecin                      | 2vwc             | 2                       | 7   | <b>none</b>                               |                                                                                                                  |
|                       | Topoisomerase<br>PDK3<br>PhoQ | Radicicol        | 1bgq                    | 2   | 6                                         | <b>none</b>                                                                                                      |
| 2hkj                  |                               |                  | <b>1</b>                |     |                                           | Substituent OH to peripheral O                                                                                   |
| 2q8i                  |                               |                  | <b>none</b>             |     |                                           |                                                                                                                  |
| 3cgy                  |                               |                  | <b>1</b>                |     |                                           | Substituent OH to ring O                                                                                         |

<sup>a</sup>Protein Data Bank code for the protein-MC complex structure used for the analysis. <sup>b</sup>Number of hydrogen bond donors (HBD) and acceptors (HBA) present in the MC compound. HBD are defined as NH or OH groups; HBA as N or O atoms with a lone pair that is not involved in an aromatic ring. Amide N atoms were also excluded from the HBA count.

**Supplementary Table 6:** Comparator Set of protein-ligand complexes containing traditional drug-like ligands. This set was primarily based on the “Astex Diverse Set” of protein-ligand complex structures that was originally developed as a test set for benchmarking docking software (3), supplemented by additional complex structures from the EMBL-EBI index of approved drugs (<http://www.ebi.ac.uk/thornton-srv/databases/drugport/>). From this combined set we selected complexes encompassing a diverse set of protein folds bound to ligands with reported  $K_D$  values  $\leq 100$  nM or IC50 values  $\leq 1$   $\mu$ M.

| Ligand                               | Protein                    | PDB ID |
|--------------------------------------|----------------------------|--------|
| <b>Astex Diverse Set<sup>a</sup></b> |                            |        |
| Tomudex                              | Thymidylate Synthase       | 1hvy   |
| JE-2147                              | HIV-1 Protease             | 1kzk   |
| BCX-1812                             | Neuraminidase A            | 1l7f   |
| Compound 4                           | Thrombin                   | 1oyt   |
| Indirubin-3'-monoxime                | GSK-3                      | 1q41   |
| Resveratrol                          | Quinone Reductase 2        | 1sg0   |
| Compound 2                           | Dihydrofolate Reductase    | 1s3v   |
| IDD552                               | Aldose Reductase           | 1t40   |
| Compound 1                           | Fatty acid-binding Protein | 1tow   |
| TPI                                  | Thymidine Phosphorylase    | 1uou   |
| Compound 59                          | NS5B Polymerase            | 1yvf   |
| Compound 11                          | HSP90                      | 2bsm   |
| <b>EMBL-EBI<sup>b</sup></b>          |                            |        |
| Zanamivir                            | Neuraminidase              | 1a4g   |
| Tranexamic Acid                      | Plasminogen                | 1ceb   |
| Lovastatin                           | LFA-1 (CD11A)              | 1cqp   |
| Trifluoperazine                      | Calmodulin                 | 1ctr   |
| Sitagliptin                          | Dipeptidyl Peptidase IV    | 1x70   |
| Aliskiren                            | Renin                      | 2v0z   |
| Trimethoprim                         | Dihydrofolate Reductase    | 2w3a   |
| Indomethacin                         | Prostaglandin Reductase 2  | 2zb8   |
| Miglitol                             | Maltase-Glucoamylase       | 3l4w   |
| Galantamine                          | Acetylcholinesterase       | 4ey6   |
| <b>Both Sets</b>                     |                            |        |
| Fluvastatin                          | HMG-CoA reductase          | 1hwi   |
| Tadalafil                            | Phosphodiesterase 5A       | 1xoz   |

<sup>a</sup>See supplementary reference (3).

<sup>b</sup><http://www.ebi.ac.uk/thornton-srv/databases/drugport/>

**Supplementary Table 7.** Evaluation of the druggability of the MC binding sites in the Test Set based on FTMap analysis of the unbound protein structures

| Protein name          | PDB <sup>a</sup> |              | Hot spots <sup>b</sup> |                    | Druggable <sup>c</sup> | Comments <sup>d</sup>                                                                                                                         |
|-----------------------|------------------|--------------|------------------------|--------------------|------------------------|-----------------------------------------------------------------------------------------------------------------------------------------------|
|                       | U                | B            | P                      | S                  |                        |                                                                                                                                               |
| Cyclophilin           | 2cpl             | 1cwa<br>1sfa | 1(23)+5(6)             | 3(15)              | Yes                    | MC binds edge-on in narrow, hydrophobic pocket. Site druggable, but large MC provides additional contact area.                                |
| FKBP                  | 2ppn             | 2fke<br>2dg3 | 1(18)+3(14)+<br>7(6)   | 6(7)               | Yes                    | P in deep cavity; S on surface, binding a conserved ring; P to S distance 7 Å. Non-MC binding might be weak.                                  |
| Pan. elastase         | 1esa             | 1okx         | 5(9)+7(7)              | 3(11), 4(10)       | Yes                    | P in deep pocket, S close to surface, but P to S distance < 5.5 Å. MC with tail provides additional contact area.                             |
| EF-TU                 | 1efc             | 1d8t         | 1(21)+6(5)             | 4(12)              | No                     | P to S distance 11.3 Å.                                                                                                                       |
| PP1a                  | 3egg             | 3e7a         | 2(16)                  | 6(7)               | No                     | P to S distance 12.3 Å.                                                                                                                       |
| SPase                 | 1kn9             | 1t7d         | 2(18)                  | 8(2)               | No                     | S is very small; MC with tail provides large contact area.                                                                                    |
| Chitinase             | 1guv             | 1waw<br>1wb0 | 1(23)+5(6)             | 4(10)+6(6)         | Yes                    | P to S distance < 7 Å. Very deep pocket, MC provides additional contact area with walls.                                                      |
| Actin                 | 1nwk             | 1qz5         | 3(14)                  | None               | No                     | Only end of MC tail reaches any hot spot; MC provides large contact area needed for binding.                                                  |
|                       |                  | 2asm         |                        |                    |                        |                                                                                                                                               |
|                       |                  | 2q0u         | 2(16)                  | 7(4)               | No                     | S too weak; MC provides large contact area.                                                                                                   |
| Site 3                |                  | 2q0r         | 10(2)                  | None               | No                     | No strong interaction with hot spot; MC provides large contact area.                                                                          |
| AcetylCoA Carboxylase | 3glk             | 3gid         | 3(15)+6(6)             | 4(9)+5(8)          | No                     | P to S distance > 9 Å.                                                                                                                        |
| HSP90 (closed)        | 1yer             | 1yet<br>3inw | 1(23)+3(10)            | 5(8),<br>6(8)+9(3) | Yes                    | MC binds edge-on; P to S distance < 6 Å, P and two S sites are in V-shaped arrangement; MC closes the loop and provides 3D character.         |
| HSP90 (open)          | 1yes             | 1yet<br>3inw | 1(22)+2(13)<br>+5(9)   | 3(12)              | Yes                    | MC binds edge-on; P to S distance < 7 Å.                                                                                                      |
| Topoisomerase         | 1mu5             | 2hkj         | 1(21)+4(12)            | 6(4)               | No                     | Compact site, pushing a tri-substituted ring into P; although P to S distance < 6 Å, S is weak, and MC is needed for additional contact area. |
| PKD3                  | 2pnr             | 2q8i         | 1(28)+7(2)             | None               | No                     | Compact site, pushing a three-substituted ring into P; no additional hot spot, MC provides large contact area                                 |

<sup>a</sup>U and B are Protein Data Bank (PDB) access codes for the ligand-free and macrocycle-bound structures, respectively. <sup>b</sup>Data are shown as CC rank among all CCs identified (# probes in CC). P is the primary (i.e. strongest) consensus cluster in the region, or in some cases a pair of closely adjacent CCs. S represents nearby secondary hot spots. Note that global mapping identifies fewer CCs than does the site-specific mapping described in Fig. 4 and Table 1 of the main text. <sup>c</sup>Site meets druggability criteria of possessing one major CC (or a pair of closely adjacent CCs) containing at least 16 probe clusters, plus at least one other CC within 7 Å from the first that contains at least 5 probe clusters (see text). <sup>d</sup>Description of binding mode; explanation if site not conventionally druggable by a small molecule; advantage of an MC ligand if druggable.

#### SUPPLEMENTARY REFERENCES

1. Melkoumov, A., Goupil, M., Louhichi, F., Raymond, M., de Repentigny, L., and Leclair, G. Nystatin nanosizing enhances in vitro and in vivo antifungal activity against *Candida albicans*, *J. Antimicrobial Chemotherapy*, 68, 2099-2105 (2013).
2. Vieth, M., et al. Characteristic physical properties and structural fragments of marketed oral drugs, *J Med Chem* 47, 224-232 (2004).
3. Hartshorn et al., Diverse, high-quality test set for the validation of protein-ligand docking performance. *J. Med. Chem.* 50, 726-741 (2007).
